# Supplementary material
Source: publisher site journal article supplement (https://www.dovepress.com/article/373421)
Supplement: Supplementary file 1 [file get_supplementary_file.php]

**Supplementary Materials**

Supplementary Table 1.Antibodies used in immunofluorescence staining

| **Primary Antibodies** | **Company** |
| --- | --- |
| Rabbit Anti-Rat Neurofilament 200 | Sigma-Aldrich |
| Chicken Anti-Mouse MBP | EMD Millipore Corporation |
| Mouse Anti-Rat S-100 | Sigma-Aldrich |
| **Secondary Antibodies** |  |
| Donkey Anti-Mouse IgG, Cy™3-conjugated | Jackson Immuno Research Labratories |
| Donkey Anti-Rabbit IgG, Alexa Fluor® 488-conjugated | Jackson Immuno Research Labratories |
| Donkey Anti-Chicken IgG, Alexa Fluor® 647-conjugated | Jackson Immuno Research Labratories |
